# Supplementary material for: Analysis of COVID-19 Infection and Mortality Among Patients With Psychiatric Disorders, 2020
Source: PubMed Central journal article supplement (PMC8611476; doi:10.1001/jamanetworkopen.2021.34969), 2021-11-23

## Supplemental Online Content

Teixeira AL, Krause TM, Ghosh L, et al. Analysis of COVID-19 infection and mortality among patients with psychiatric disorders, 2020. *JAMA Netw Open*. 2021;4(11):e2134969. doi:10.1001/jamanetworkopen.2021.34969

**eTable.** ICD-10 Codes Used to Define Each Cohort and Logic Steps

**eFigure.** Flowchart

This supplemental material has been provided by the authors to give readers additional information about their work.

**eTable: ICD-10 Codes Used to Define Each Cohort and logic steps (#).**

| <b>Group 1:<br/>Schizophrenia<br/>spectrum</b>          | <b>Group 2:<br/>Mood<br/>disorders</b>    | <b>Group 3:<br/>Anxiety<br/>disorders</b> | <b>Group 4:<br/>Drug<br/>indicator only</b>                               | <b>Reference Group Exclusions</b>                                                    |
|---------------------------------------------------------|-------------------------------------------|-------------------------------------------|---------------------------------------------------------------------------|--------------------------------------------------------------------------------------|
| <b>ICD-10<br/>CODES</b>                                 | <b>ICD-10<br/>CODES</b>                   | <b>ICD-10<br/>CODES</b>                   | <b>DRUG_CLASS</b>                                                         | Exclusion diagnoses used for<br>Groups 1, 2, 3, 4 and the following                  |
| F20*<br>(schizophrenia)                                 | F30*<br>(bipolar<br>disorder)             | F40*<br>(phobic<br>anxiety<br>disorders)  | Antipsychotics                                                            | F42* (Obsessive-compulsive<br>disorder)                                              |
| F22*<br>(delusional<br>disorders)                       | F31*<br>(bipolar<br>disorder)             | F41*<br>(other<br>anxiety<br>disorders)   | Antidepressants;<br>miscellaneous                                         | F43* (Reaction to severe stress, and<br>adjustment disorders)                        |
| F23* (acute and<br>transient<br>psychotic<br>disorders) | F32*<br>(major<br>depressive<br>disorder) |                                           | Selective<br>serotonin<br>reuptake<br>inhibitor (SSRI)<br>antidepressants | F44* (Dissociative and conversion<br>disorders)                                      |
| F25*<br>(schizoaffective<br>disorder)                   | F33*<br>(major<br>depressive<br>disorder) |                                           | Serotonin and<br>norepinephrine<br>reuptake<br>inhibitors                 | F45* (Somatoform disorders)                                                          |
| F28 (other<br>nonorganic<br>psychotic<br>disorders)     | F34*<br>(persistent<br>mood<br>disorder)  |                                           |                                                                           | F48* (Other nonpsychotic mental<br>disorders)                                        |
| F29<br>(unspecified<br>nonorganic<br>psychosis)         | F39*<br>(unspecified<br>mood<br>disorder) |                                           |                                                                           | F50* (Eating disorders)                                                              |
| <b>ICD 9 CODES</b>                                      | <b>ICD 9<br/>CODES</b>                    | <b>ICD 9<br/>CODES</b>                    |                                                                           | F51* (Sleep disorders not due to a<br>substance or known physiological<br>condition) |
| 295x                                                    | 296x                                      | 300x                                      |                                                                           | F53* (Mental and behavioral<br>disorders associated with the<br>puerperium)          |

|                    |                    |                    |  |                                                               |
|--------------------|--------------------|--------------------|--|---------------------------------------------------------------|
| 297x               |                    |                    |  | F60* (Other specific personality disorders)                   |
| 298x               |                    |                    |  | F68* (Other disorders of adult personality and behavior)      |
| <b>SNOMED CODE</b> | <b>SNOMED CODE</b> | <b>SNOMED CODE</b> |  | F69* (Unspecified disorder of adult personality and Behavior) |
| 58214004           | 46206005           | 197480006          |  | F90* (Attention-deficit hyperactivity disorders)              |
| 69322001           |                    |                    |  | F95* (Tic disorder)                                           |
|                    |                    |                    |  | F99 (Mental disorder, not otherwise specified)                |

(#) Logic Steps:

1. Use only people with a 2020 COVID-19 Test and a definitive Test Result;
2. Identify 'Psychiatry Diagnosis Group' by searching in data prior to 3/1/2020 for any of the diagnoses in table (in any coding position) and place them in category 1, 2, or 3 (If a person meets 2 or more groups, assign only to one group where 1 trumps 2 trumps 3);
3. Identify Group 4 by searching in patient reported medications AND/OR Prescriptions Written for DRUG\_CLASS and select persons who did NOT fall into Group 1, 2 or 3: (these are people identified ONLY by drug and not by diagnosis code)
4. Identify Reference Group from remaining persons with a 2020 COVID-19 Test and a definitive Test Result, excluding those that meet exclusion criteria in Table.

**eFigure: Flowchart.**

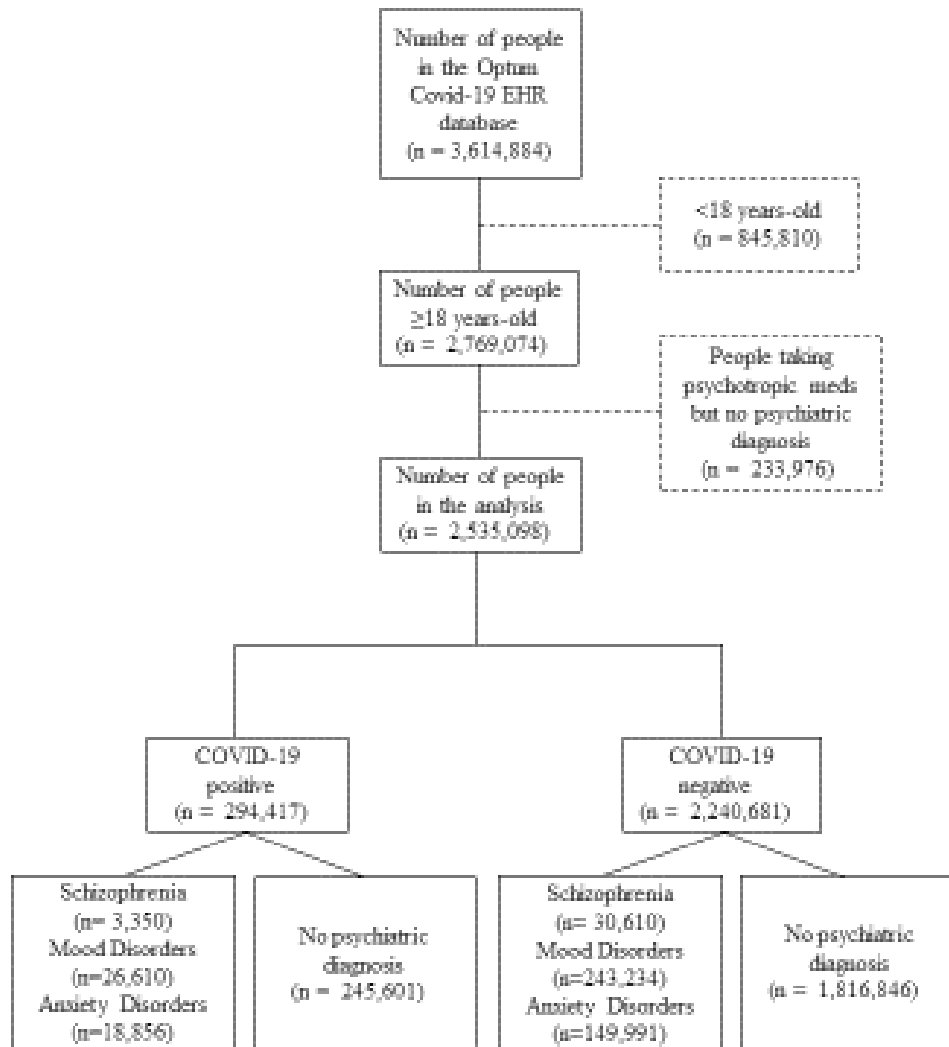

Supplement: jamanetwopen-e2134969-s001.pdf [file jamanetwopen-e2134969-s001.pdf]
